# Supplementary material
Source: Springer Nature journal article supplement (https://www.springermedizin.de/resource/supplementary/12889_2011_3208_MOESM1_ESM.pdf/9488490)
Supplement: MOESM1 [file 9488490]

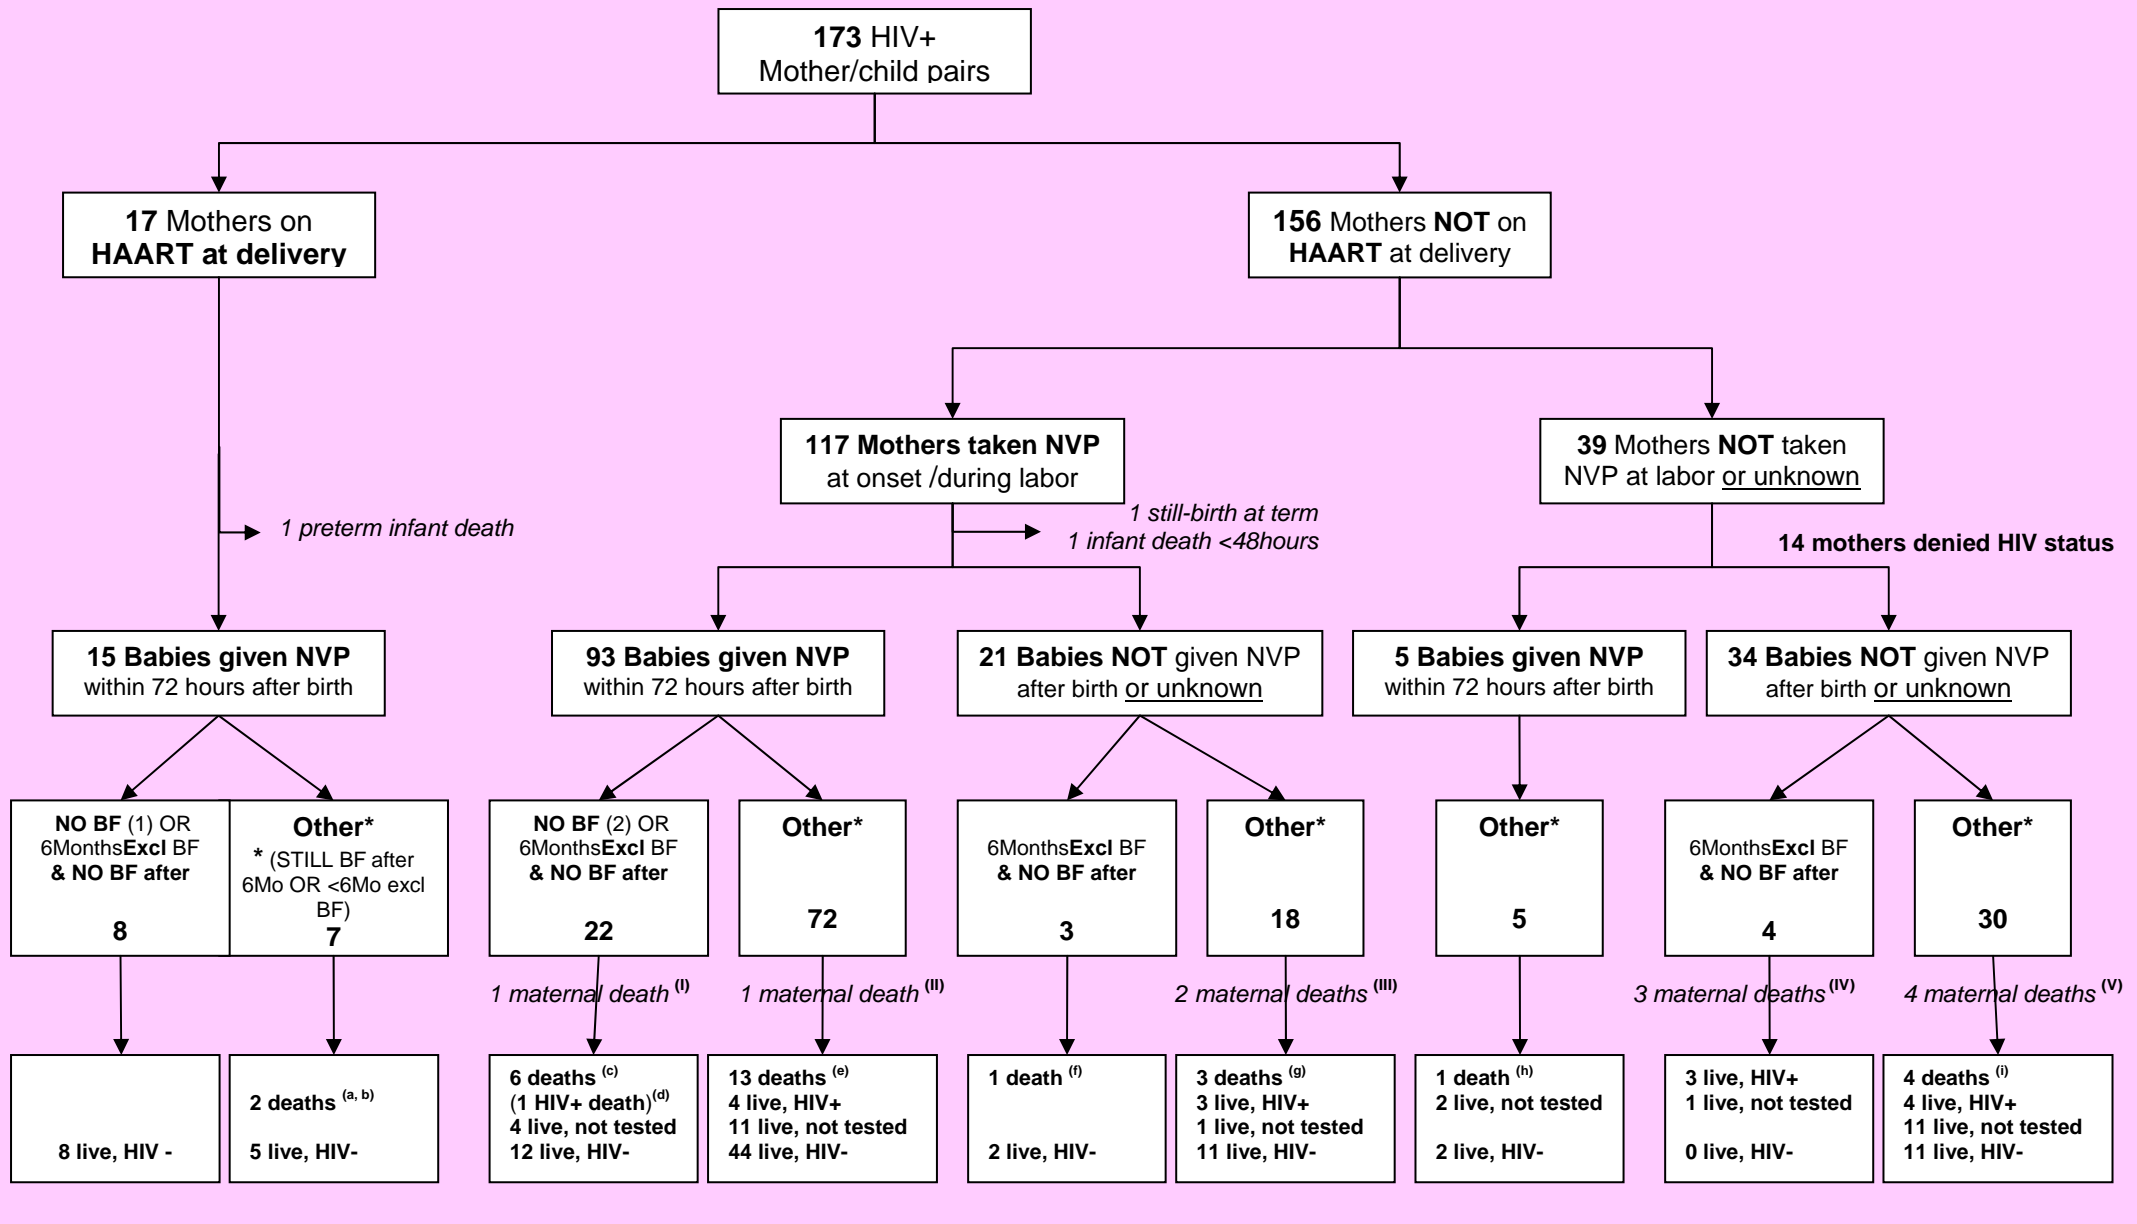

a) ART from conception, infant died at 5 days.  
 b) ART from conception, stopped BF at 4Mo, child died at 10Mo.

c) 1 infant never breastfed, died at 7 days  
 1 infant died at 3Mo, 1 at 9Mo, 3 between 12-20Mo  
 d) HIV+ child died at 14 Mo  
 e) 2 infants died <6Mo, 6 between 6-12Mo, 5 between 12-20Mo

f) infant died at 7Mo  
 g) 3 children died between 10-15Mo  
 h) infant died at 12 days

(i) 2 infants died at 1 Mo, 1 at 2Mo, 1 at 12Mo

I) mother died at 11Mo child age; child HIV-.  
 II) mother died at 11Mo after birth; infant died at 7Mo.

III) 1 mother died at 14Mo child age; child died at 15Mo  
 . 1 mother died at 17Mo after birth; child died at 10Mo

IV) 3 mothers died at child age 10, 12, 19 Mo;  
 2 live HIV+, 1 live not tested  
 V) 2 mothers died at child age 4 and 11 Mo; both children live, HIV-. 1 mother died at 9Mo child age; child died at 12Mo. 1 mother died 3 Mo after birth, child died at 1Mo
